# Supplementary material
Source: publisher figshare collection journal article supplement (https://acs.figshare.com/ndownloader/files/20046719)
Supplement: Supplementary file 1 [file 20046719]

Supporting Information (SI)

**Coupled Effect of Sulfidation and Ferrous  
Dosing on Selenate Removal by Zerovalent  
Iron Under Aerobic Conditions**

Peng Fan,<sup>†,‡,§</sup> Yuankui Sun,<sup>†,‡,§</sup> Baoxue Zhou,<sup>‡,||</sup> Xiaohong Guan<sup>†,‡,§\*</sup>

<sup>†</sup>State Key Laboratory of Pollution Control and Resources Reuse, College of Environmental  
Science and Engineering, Tongji University, Shanghai 200092, China

<sup>‡</sup>Shanghai Institute of Pollution Control and Ecological Security, Shanghai 200092, China

<sup>§</sup>International Joint Research Center for Sustainable Urban Water System, Tongji  
University, Shanghai 200092, China

<sup>||</sup>School of Environmental Science and Engineering, Shanghai Jiao Tong University,  
Shanghai 200240, China

\*Author to whom correspondence should be addressed

Xiaohong Guan, email: [guanxh@tongji.edu.cn](mailto:guanxh@tongji.edu.cn); phone: +86-21-65983869

**Prepared for *Environmental Science & Technology***

Number of pages (including this page): 34

Number of Texts: 8

Number of Figures: 16

Number of Tables: 2

## Summary

**Text S1.** Details of materials using in this study. (Page S5)

**Text S2.** Experimental procedures of this study. (Page S7)

**Text S3.** Determination of molar quantities of Fe(0), Fe(II), and Fe(III). (Page S8)

**Text S4.** Details of characterizing the solid phase with X-ray absorption fine structure (XAFS) analyses. (Page S9)

**Text S5.** Determination of molar quantities of S(–II), S (–I), S(0), S(VI), Se(0), Se(IV), and Se(VI). (Page S11)

**Text S6.** Details of other analytical methods used in this study. (Page S13)

**Text S7.** Details of the calculating method of  $k$ . (Page S14)

**Text S8.** Details of the calculating method of electron efficiency of reductants (EER). (Page S15)

**Figure S1.** Kinetics of Se(VI) removal by ZVI, ZVI/Fe<sup>2+</sup>, S-ZVI, and S-ZVI/Fe<sup>2+</sup> at different initial Se(VI) concentrations. (Page S16)

**Figure S2.** Illustration of the parameters used in the calculation of  $k_r$  in this study. (Page S17)

**Figure S3.** Se  $K$ -edge XANES spectra of S-ZVI samples reacted with Se(VI) at pH<sub>0</sub> 6.0 for different durations in S-ZVI/Fe<sup>2+</sup> system. (Page S18)

**Figure S4.** S  $K$ -edge XANES spectra of S-ZVI samples reacted with Se(VI) at pH<sub>0</sub> 6.0 for different durations in S-ZVI and S-ZVI/Fe<sup>2+</sup> systems. (Page S19)

**Figure S5.** Kinetics of Se(VI) removal by ZVI, ZVI/Fe<sup>2+</sup>, S-ZVI, and S-ZVI/Fe<sup>2+</sup> systems, using 6 types of ZVI. (Page S20)

**Figure S6.** Promotion factors for the amount of removed Se(VI) (a, c) and initial

removal rate (b, d) due to sulfidation or  $\text{Fe}^{2+}$  dosing for the pristine ZVI.  
(Page S21)

**Figure S7.** Promotion factors for the amount of removed Se(VI) (a, c) and initial  
removal rate (b, d) due to sulfidation or  $\text{Fe}^{2+}$  dosing in S-ZVI/ $\text{Fe}^{2+}$  system.  
(Page S22)

**Figure S8.** X-ray diffraction scans of ZVI precipitates reacted with Se(VI) in ZVI,  
ZVI/ $\text{Fe}^{2+}$ , S-ZVI, and S-ZVI/ $\text{Fe}^{2+}$  systems at different reaction time. (Page  
S23)

**Figure S9.** SEM images of ZVI precipitates reacted with Se(VI) in ZVI, ZVI/ $\text{Fe}^{2+}$ ,  
S-ZVI, and S-ZVI/ $\text{Fe}^{2+}$  systems. (Page S24)

**Figure S10.** Influence of  $\text{Fe}^{2+}$  dosing on variation of pH values during Se(VI)  
removal by ZVI or S-ZVI. (Page S25)

**Figure S11.** Influence of  $\text{Fe}^{2+}$  dosing on the kinetics of Se(VI) removal by ZVI and  
S-ZVI at pH 5.5. (Page S26)

**Figure S12.** X-ray diffraction scans of ZVI precipitates reacted with 50.0 or 100  
mg/L Se(VI) in ZVI, ZVI/ $\text{Fe}^{2+}$ , S-ZVI, and S-ZVI/ $\text{Fe}^{2+}$  systems. (Page S27)

**Figure S13.** Variations of  $\text{Fe}^{2+}$  concentrations in the ZVI/ $\text{Fe}^{2+}$  and S-ZVI/ $\text{Fe}^{2+}$   
systems at different initial Se(VI) concentrations. (Page S28)

**Figure S14.** Real-time photos of solutions after Se(VI) reacted with (a) ZVI,  
ZVI/ $\text{Fe}^{2+}$ , S-ZVI, and S-ZVI/ $\text{Fe}^{2+}$  systems at 12 h; (b) S-ZVI and S-ZVI/ $\text{Fe}^{2+}$   
systems at 2 h and 6 h. (Page S29)

**Figure S15.** Fe *K*-edge EXAFS spectra (a) and Fe *k*<sup>3</sup>-weighted EXAFS spectra (b) of  
S-ZVI samples reacted with Se(VI) for different durations without and with

66  $\text{Fe}^{2+}$ . (Page S30)

67 **Figure S16.** The variation of  $\text{Fe}^{3+}$  quantity in the solid phase of S-ZVI and  
68 S-ZVI/ $\text{Fe}^{2+}$  systems during Se(VI) removal, using 7 types of ZVI. (Page S31)

69 **Table S1.** Summary of the properties of the ZVI and S-ZVI samples employed in this  
70 study. (Page S32)

71 **Table S2.** Molar quantity of elements with various valence states before and after  
72 Se(VI) removal by S-ZVI and S-ZVI/ $\text{Fe}^{2+}$  in different reaction time. (Page  
73 S33)

**Text S1.** Details of materials using in this study.

Seven types of ZVI samples were used in this study and they were named to be Alfa (supplied by Alfa Aesar Chemical Reagent Co.), Aladdin (supplied by Aladdin Chemical Co.), Aldrich (supplied by Aldrich Chemical Co.), Macklin (supplied by Macklin Chemical Co.), Sinopharm (supplied by Sinopharm Chemical Reagent Co.), Tianjin (supplied by Tianjin Fengchuan Chemical Reagent Technologies Co.), and Weifang (supplied by Weifang Kaihong Metal Products Co.), respectively. S-ZVI with a S/Fe molar ratio of 0.05 was synthesized following the ball-milling method employed in our previous studies, and the S/Fe molar ratio (0.05) was selected because it was determined to be the optimum value for sequestering either Cr(VI) or Se(VI) under aerobic conditions in prior studies.<sup>1, 2</sup> In brief, 5.0 g of pristine ZVI was mixed with 0.1429 g sulfur powder to achieve the S/Fe molar ratios of 0.05. The mixture was milled in a planetary ball mill (Boyuntong Instrument Technology, Nanjing, China) with stainless steel jars (100 mL) and stainless steel balls (15 balls with 10 mm in diameter and 80 balls with 6 mm in diameter in one jar). The milling was performed at 500 rpm and at room temperature (Change of temperature was not detected during milling). In particular, the ball-milled ZVI without adding elemental S was also fabricated for comparison. After ball-milling for 4 h, the obtained S-ZVI samples were freeze-dried for 24 h and then stored in a N<sub>2</sub>-filled glovebox (Mikrouna, china) for subsequent characterization and use. To explore the influence of Fe<sup>2+</sup> dosing, FeCl<sub>2</sub>•4H<sub>2</sub>O was added simultaneously into the working solution with ZVI or S-ZVI particles. FeCl<sub>2</sub>•4H<sub>2</sub>O dissolved in the solution instantly and thus had no

96 effects on the surface area of ZVI or S-ZVI before the reaction. Sodium selenate  
97 ( $\text{Na}_2\text{SeO}_4$ ) was supplied by the Xiya Reagent Company. The other chemical reagents  
98 were purchased from the Sinopharm Chemical Reagent Company. All chemicals were  
99 obtained at the available highest purity and were used as received. All solutions were  
100 prepared with ultrapure water generated from a Milli-Q system. Stock solution of  
101 1000 mg/L Se(VI) was prepared by dissolving  $\text{Na}_2\text{SeO}_4$  in ultrapure water.

**Text S2.** Experimental procedures of this study.

A typical test was initiated by adding 0.25 g ZVI or S-ZVI particles into a 500 mL working solution at 25 °C, open to the air. To explore the influence of  $\text{Fe}^{2+}$  dosing on Se(VI) removal by ZVI or S-ZVI, 0.50 mM  $\text{FeCl}_2 \cdot 4\text{H}_2\text{O}$  was added simultaneously into the working solution with ZVI or S-ZVI particles. Then the solution was mixed with a propeller agitator (D2004W, Shanghai Sile Instrument Co. Ltd.) at 400 rpm. At selected time intervals, a suspension of 5.0 mL was withdrawn and immediately passed through a 0.22  $\mu\text{m}$  membrane filter, and then acidified with 40  $\mu\text{L}$   $\text{HNO}_3$  for analysis. After the batch tests, the reacted ZVI or S-ZVI precipitates were collected, washed with ultrapure water for 3 times, freeze-dried in vacuum, and then kept in a glove box for the subsequent characterization.

**Text S3.** Determination of the molar quantities of Fe(0), Fe(II), and Fe(III).

In the solid phase, the molar quantity of Fe(0) was calculated as follows:

$$n_{\text{Fe(0)}} = (n_{\text{Fe(0)0}} + n_{\text{Fe(II)0}} - n_{\text{Fe(II)aq}}) \cdot \frac{n_{\text{Fe(0)sample}}}{n_{\text{Fe(0)sample}} + n_{\text{Fe(II)sample}} + n_{\text{Fe(III)sample}}}$$

$n_{\text{Fe(0)sample}}$ ,  $n_{\text{Fe(II)sample}}$ ,  $n_{\text{Fe(III)sample}}$  are the molar quantities in the solid samples measured by digestion method.  $n_{\text{Fe(0)sample}}$  was determined by measuring the volume of  $\text{H}_2$  evolved upon particle digestion in concentrated HCl (5.0 M).  $n_{\text{Fe(II)sample}}$  was the difference between total dissolved Fe(II) concentration and the calculated content of  $\text{Fe}^0$ .  $n_{\text{Fe(III)sample}}$  was the disparity between the content of total Fe after sample dissolution in concentrated HCl and total Fe(II) concentration in the dissolved solution. The Fe(II) concentration was determined with the 1,10-phenanthroline colorimetric methods using a UV/visible spectrophotometer (TU-1901, Purkinje General Instrument) at 510 nm and the concentration of total Fe was determined with Atomic Absorption Spectroscopy (Thermo Fisher Scientific iCE 3300 AAS). The molar quantities of Fe(II) and Fe(III) in the solid phase were calculated using the similar formula.

In the aqueous solution, the molar quantities of Fe(II) and Fe(III) were calculated as follows:

$$n_{\text{Fe(II)}} = n_{\text{Fe(II)aq}}$$

$$n_{\text{Fe(III)}} = n_{\text{Fe}_{\text{tot, aq}}} - n_{\text{Fe(II)aq}}$$

$n_{\text{Fe}_{\text{tot, aq}}}$  was determined with AAS while  $n_{\text{Fe(II)aq}}$  was determined with UV/visible spectrophotometer.



**Text S4.** Details of characterizing the solid phase with X-ray absorption fine structure (XAFS) analyses.

Fe *K*-edge and Se *K*-edge XAFS analyses were performed with Si(111) crystal monochromators at the BL14W Beam line at the Shanghai Synchrotron Radiation Facility (SSRF) (Shanghai, China). Before the analysis at the beamline, samples were placed into aluminum sample holders and sealed using Kapton tape film. Particular care was taken to minimize the beam-induced oxidation of the samples by placing the sample stands filled with reacted ZVI samples in a nitrogen-filled glove box for 6 hours before transferring them to zippered bags in this glove box. The XAFS spectra were recorded at room temperature using a 4-channel Silicon Drift Detector (SDD) Bruker 5040. Fe *K*-edge extended X-ray absorption fine structure (EXAFS) spectra were recorded in transmission mode while Se *K*-edge X-ray absorption near edge structure (XANES) spectra were recorded in fluorescence mode. Negligible changes in the line-shape and peak position of Fe and Se *K*-edge XANES spectra were observed between two scans taken for a specific sample. The oxidation states of Se in solid phase were analyzed by linear combination fitting (LCF) using reference compounds of Se powder (Se<sup>0</sup>), Na<sub>2</sub>SeO<sub>3</sub> (Se(IV)), and Na<sub>2</sub>SeO<sub>4</sub> (Se(VI)). The major species of Fe in Se-treated ZVI corrosion products were also quantified by LCF using the collection of reference materials including metallic Fe (Fe<sup>0</sup>), maghemite (γ-Fe<sub>2</sub>O<sub>3</sub>), goethite (α-FeOOH), lepidocrocite (γ-FeOOH), and magnetite (Fe<sub>3</sub>O<sub>4</sub>). The XAFS spectra of these standard samples were recorded in transmission mode. The spectra were processed and analyzed by the software codes Athena.

S *K*-edge XANES spectra were recorded at the Beijing Synchrotron Radiation Facility (BSRF), Beijing, China. The storage ring operated at 2.5 GeV with electron currents between 100–200 mA. The Si(111) crystals of the fixed-exit double-crystal monochromator were used to produce a monochromatic photon beam. The spectra were recorded at a step width of 1 eV in an energy interval from 2465 to 2490 eV in fluorescence mode to provide the chemical information of S in the bulk of S-ZVI before or after reaction with Se(VI). The reference samples were measured in transmission mode and five spectra were averaged to increase the signal-to-noise ratio. The spectra were processed and analyzed by the software Athena. The fractions of various sulfur species in solid phase were determined by LCF using reference compounds of sulfide (FeS), disulfide (FeS<sub>2</sub>), elemental S, and sulfate (Na<sub>2</sub>SO<sub>4</sub>).

**Text S5.** Determination of molar quantities of S(-II), S (-I), S(0), S(VI), Se(0), Se(IV), and Se(VI).

The fractions of S(-II), S(-I), S(0), and S(VI) in the solid phase were quantified based on the S *K*-edge XANES spectra. In the solid phase, the molar quantity of S(0) was calculated with the following equation:

$$n_{S(0)} = n_{S_{tot,0}} \cdot r_{S(0)_{sample}}$$

$r_{S(0)_{sample}}$  is the ratio of S(0) in the solid samples.  $n_{S_{tot,0}}$  represents the molar quantity of total S in the fabricated S-ZVI samples, which was measured by carbon-sulfur analyzer (ELTRA CS800, Germany). The molar quantities of S(-II), S(-I), and S(VI) in the solid phase were calculated using the similar formula.

In aqueous solution, various sulfur species including  $SO_4^{2-}$ ,  $SO_3^{2-}$ , and  $S_2O_3^{2-}$  were determined using an ion chromatography equipped with an Ion Pac AS19 analytical column ( $4 \times 250 \text{ mm}^2$ ) and an Ion Pac AG19 guard column ( $4 \times 50 \text{ mm}^2$ ) (Thermo Scientific Dionex ICS-5000). It was found that negligible soluble sulfur-containing anions existed in the solution.

The fractions of Se(VI), Se(IV), and Se(0) in the solid phase were derived from the LCF of the Se *K*-edge XANES spectra. In the solid phase, the molar quantity of Se(0) was calculated via the following equation:

$$n_{Se(0)} = n_{Se(VI)_0} \cdot \left(1 - \frac{C}{C_0}\right) \cdot a_{Se(0)}$$

$a_{Se(0)}$  stands for the fraction of Se(0) in precipitates derived from the LCF of Se *K*-edge XANES spectra.  $n_{Se(VI)_0}$  represents the initial molar quantity of Se(VI) in the

188 experiment (0.19 mM).  $\frac{C}{C_0}$  represents the ratio of Se(VI) concentration at selected  
189 reaction conditions. The molar quantities of Se(IV) and Se(VI) in the solid phase were  
190 calculated using the similar formula.

191 Since Se(VI) was the only Se species detected in aqueous phase by  
192 HPLC-ICP-MS, its molar quantity was calculated via the following equation:

193 
$$n_{\text{Se(VI)}} = n_{\text{Se(VI)}_0} \cdot \frac{C}{C_0}$$

**Text S6.** Details of other analytical methods used in this study.

X-ray diffraction (XRD, DXR-8000, Rigaku) analyses of the precipitates were conducted using a diffracted beam graphite monochromator and Cu radiation at 40 kV and 40 mA, scanning in the  $2\theta$  range of  $10-90^\circ$  with a step size of  $0.02^\circ$  and a count time of 2 s per step. The specific surface areas of the ZVI samples were determined by nitrogen adsorption using the Brunauer-Emmet-Teller (BET) method (Micrometrics ASAP 2020). The size distributions of the ZVI samples were determined by a Mastersizer 3000 laser diffraction particle size analyzer. The scanning electron microscope (SEM) images of the reacted ZVI samples were collected with a Hitachi 4700 microscope (at 15 kV). The pH value of working solution was monitored with a commercial electrode (INESA pHs-3C, JBP-607). The concentrations of total Fe ( $\text{Fe}_{\text{tot}}$ ) and total Se ( $\text{Se}_{\text{tot}}$ ) in the aqueous sample were determined with an atomic absorption spectrometer (Thermo Fisher Scientific iCE 3300 AAS). The speciation of Se(IV) and Se(VI) in aqueous phase was determined with HPLC-ICP-MS (Agilent HPLC 1200-ICPMS 7700). The concentration of dissolved  $\text{Fe}^{2+}$  in the solution was determined with the ferrozine method at the wavelength of 510 nm using an ultraviolet-visible spectrophotometer (Purkinje TU-1902).

**Text S7.** Details of the calculating method of  $k$ .

Since all reactions have reached the equilibrium at the end of reaction in Figure S1 (12 h for 5.0 and 10.0 mg/L Se(VI), 48 h for 20.0 mg/L Se(VI), 72 h for 30.0, 50.0, and 100 mg/L Se(VI)), the amount of Se(VI) removed at the end of reaction could be regarded as that removed at equilibrium. The theoretical value of  $Q_{\text{removal-half}}$  can be calculated with the following equation:

$$Q_{\text{removal-half}} = \frac{Q_{\text{removal-final}}}{2}$$

where  $Q_{\text{removal-final}}$  represents the amount of Se(VI) removed at the end of the reaction. The difference between the theoretical value of  $Q_{\text{removal-half}}$  and of the amount of Se(VI) removed at different time intervals was compared, and the real value of  $Q_{\text{removal-half}}$  (referred to  $Q'_{\text{removal-half}}$  herein) is determined when the minimum value is obtained.  $t'_{\text{half}}$  is the time point corresponding to  $Q'_{\text{removal-half}}$ , and  $k_r$  can be calculated with the following equation in this study.

$$k_r = \frac{Q'_{\text{removal-half}}}{t'_{\text{half}}}$$

**Text S8.** Details of the calculating method of electron efficiency of reductants (EER).

EER, defined as the percentage of electrons transferred to the target contaminant over the amount of electrons donated by ZVI and other reductants, if there are any, is used to assess the selectivity of reductants toward target contaminant during reductive removal of contaminant by ZVI system. The electrons provided by S and dosed  $\text{Fe}^{2+}$  should be taken into account where S-ZVI and  $\text{ZVI}/\text{Fe}^{2+}$  was employed. Molar quantities of S with various valence states in S-ZVI before and after the reaction with Se(VI) were determined. The EER of bare ZVI,  $\text{ZVI}/\text{Fe}^{2+}$ , S-ZVI, and S-ZVI/ $\text{Fe}^{2+}$  systems for Se(VI) sequestration can be calculated via equations 1 and 2, respectively.

$$\text{EER}(\%) = \frac{2n_{\text{Se(IV)}} + 6n_{\text{Se(0)}}}{3(n_{\text{Fe(III)}} - n'_{\text{Fe(III)}}) + 2(n_{\text{Fe(II)}} - n'_{\text{Fe(II)}})} \quad (1)$$

$$\text{EER}(\%) = \frac{2n_{\text{Se(IV)}} + 6n_{\text{Se(0)}}}{3(n_{\text{Fe(III)}} - n'_{\text{Fe(III)}}) + 2(n_{\text{Fe(II)}} - n'_{\text{Fe(II)}}) + 8(n_{\text{S(VI)}} - n'_{\text{S(VI)}}) + 2(n_{\text{S(0)}} - n'_{\text{S(0)}}) + (n_{\text{S(-I)}} - n'_{\text{S(-I)}})} \quad (2)$$

Where  $n_{\text{Se(IV)}}$ ,  $n_{\text{Se(0)}}$ ,  $n_{\text{Fe(III)}}$ ,  $n_{\text{Fe(II)}}$ ,  $n_{\text{S(VI)}}$ ,  $n_{\text{S(0)}}$  and  $n_{\text{S(-I)}}$  are the molar quantities of Se(IV), Se(0), Fe(III), Fe(II), S(VI), S(0), and S(-I) in both solid and liquid phases at given reaction time, respectively.  $n'_{\text{Fe(III)}}$ ,  $n'_{\text{Fe(II)}}$ ,  $n'_{\text{S(VI)}}$ ,  $n'_{\text{S(0)}}$  and  $n'_{\text{S(-I)}}$  stand for the molar quantities of Fe(III), Fe(II), S(VI), S(0), and S(-I) in both solid and liquid phases before the reaction, respectively. It should be specified that, the EER values calculated using equations 1 and 2 are not the instantaneous electron efficiencies of ZVI but are the mean values during the whole elapsed time. It should be noted that the EER values in ZVI,  $\text{ZVI}/\text{Fe}^{2+}$ , and S-ZVI systems were cited from our previous study.<sup>1</sup>

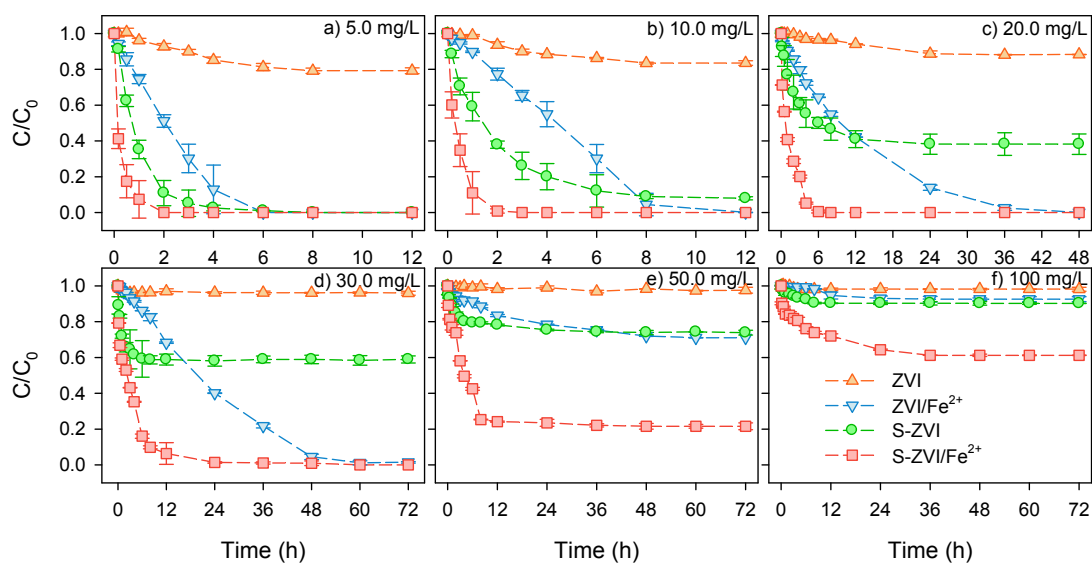

**Figure S1.** Kinetics of Se(VI) removal by ZVI, ZVI/Fe<sup>2+</sup>, S-ZVI, and S-ZVI/Fe<sup>2+</sup> at different initial Se(VI) concentrations. Reaction conditions: pH<sub>0</sub> 6.0, ZVI or S-ZVI = 0.50 g/L, [Fe<sup>2+</sup>]<sub>0</sub> = 0.50 mM, Alfa ZVI.



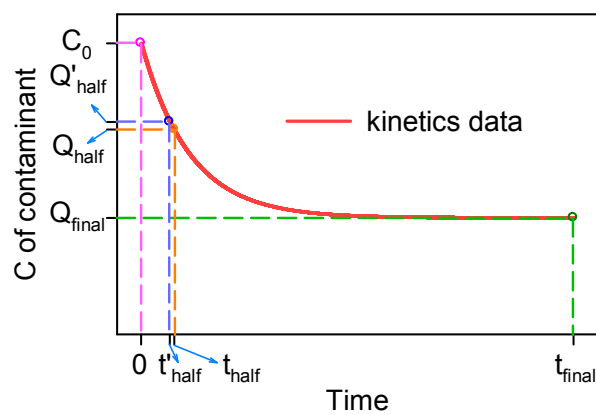

250

251 **Figure S2.** Illustration of the parameters used in the calculation of  $k_r$  in this study.

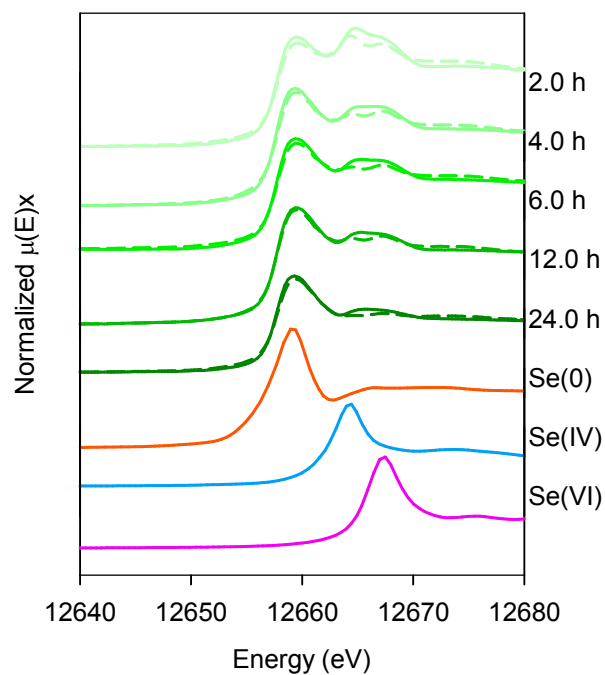

**Figure S3.** Se *K*-edge XANES spectra of S-ZVI samples reacted with Se(VI) at pH<sub>0</sub> 6.0 for different durations in S-ZVI/Fe<sup>2+</sup> system. Experimental data are shown as thick solid lines and the dashed lines represent the LCF results. Reaction conditions: pH<sub>0</sub> 6.0, [Se(VI)]<sub>0</sub> = 30.0 mg/L, S-ZVI = 0.50 g/L, [Fe<sup>2+</sup>]<sub>0</sub> = 0.50 mM, Alfa ZVI.

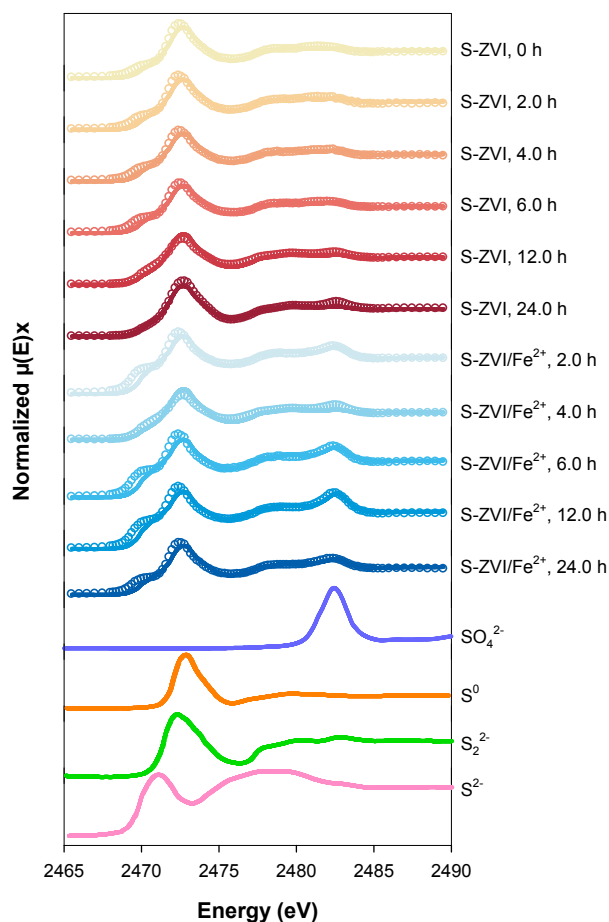

257

258 **Figure S4.** S *K*-edge XANES spectra of S-ZVI samples reacted with Se(VI) at pH<sub>0</sub>  
 259 6.0 for different durations in S-ZVI and S-ZVI/Fe<sup>2+</sup> systems. The circles and the thick  
 260 solid lines represent the experimental data and the linear combination fits,  
 261 respectively. Reaction conditions: pH<sub>0</sub> 6.0, [Se(VI)]<sub>0</sub> = 30.0 mg/L, S-ZVI = 0.50 g/L,  
 262 [Fe<sup>2+</sup>]<sub>0</sub> = 0.50 mM, Alfa ZVI.

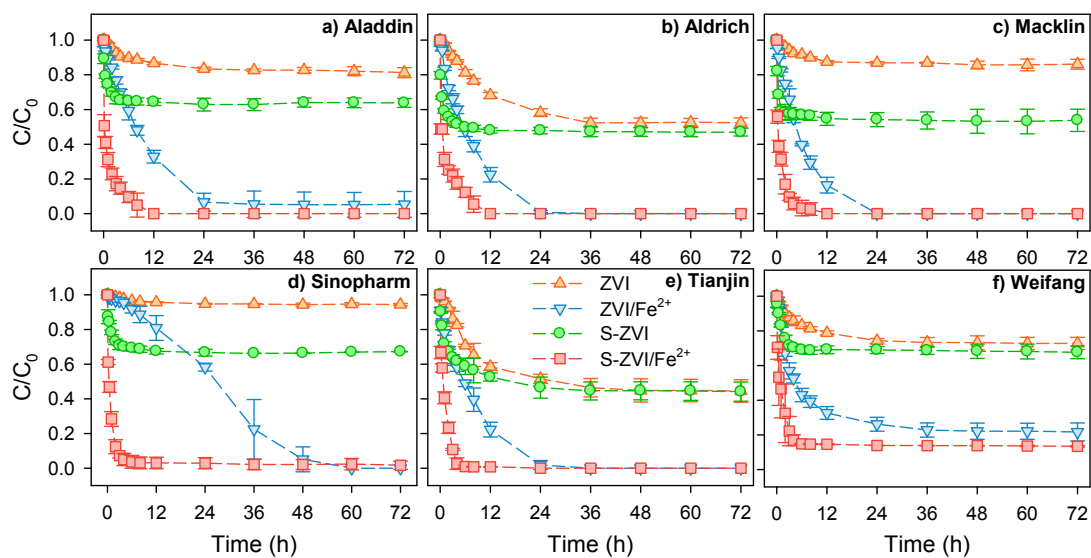

**Figure S5.** Kinetics of Se(VI) removal by ZVI, ZVI/Fe<sup>2+</sup>, S-ZVI, and S-ZVI/Fe<sup>2+</sup> systems, using 6 types of ZVI. Reaction conditions: pH<sub>0</sub> 6.0, ZVI = 0.50 g/L, [Se(VI)]<sub>0</sub> = 30.0 mg/L, [Fe<sup>2+</sup>]<sub>0</sub> = 0.50 mM.

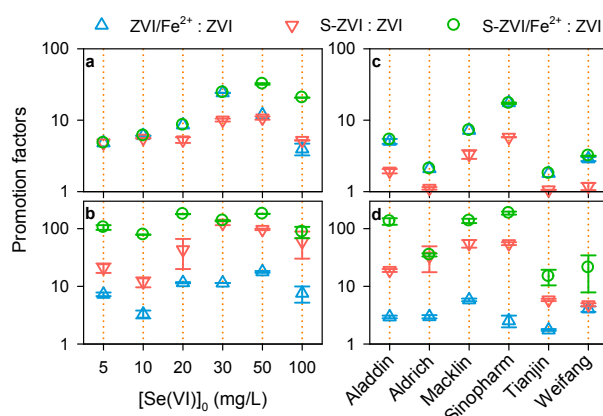

**Figure S6.** Promotion factors for the amount of removed Se(VI) (a, c) and initial removal rate (b, d) due to sulfidation or Fe<sup>2+</sup> dosing for the pristine ZVI. Reaction conditions: pH<sub>0</sub> 6.0, ZVI or S-ZVI = 0.50 g/L, (a–d) Alfa ZVI, (e–h) [Se(VI)]<sub>0</sub> = 30.0 mg/L.

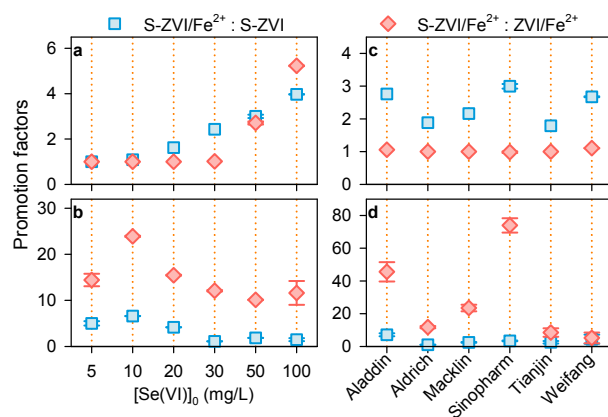

272

273 **Figure S7.** Promotion factors for the amount of removed Se(VI) (a, c) and initial  
 274 removal rate (b, d) due to sulfidation or Fe<sup>2+</sup> dosing in S-ZVI/Fe<sup>2+</sup> system. Reaction  
 275 conditions: pH<sub>0</sub> 6.0, ZVI or S-ZVI = 0.50 g/L, (a–d) Alfa ZVI, (e–h) [Se(VI)]<sub>0</sub> = 30.0  
 276 mg/L.

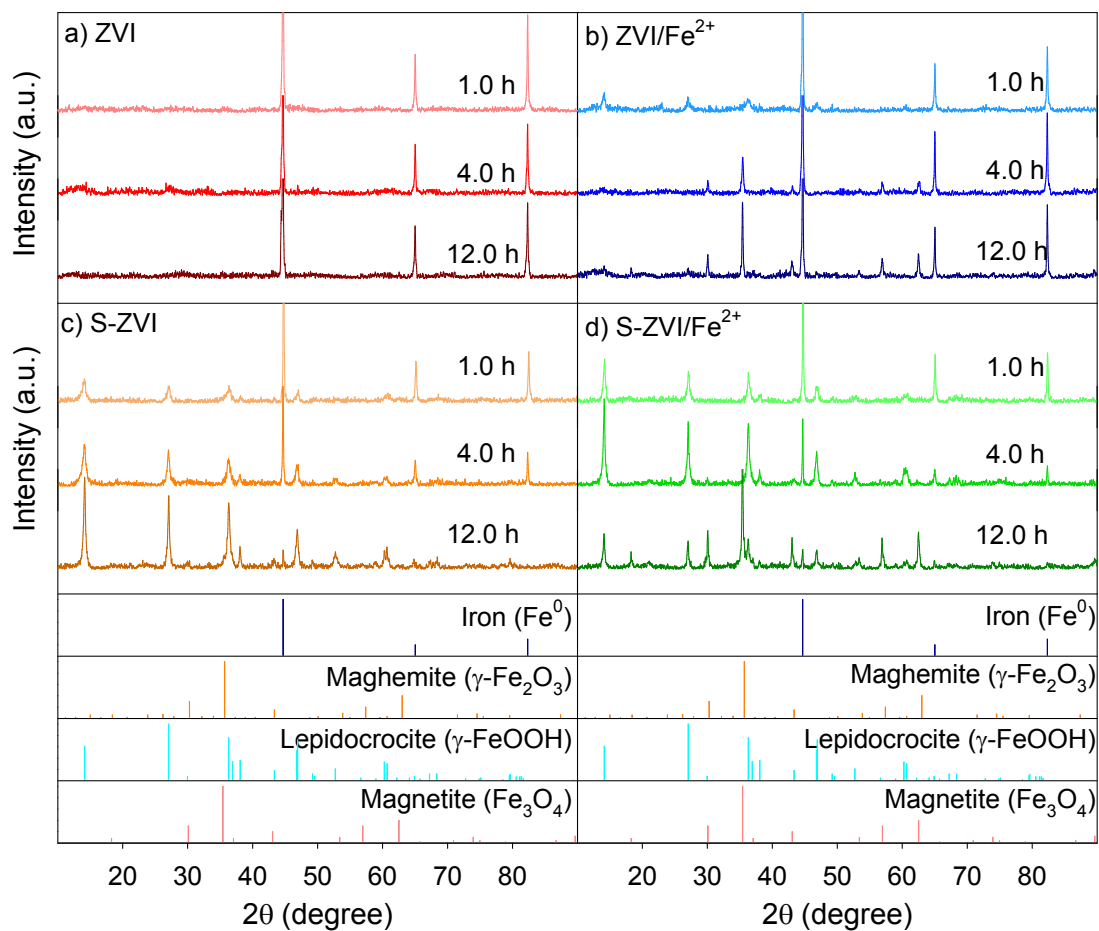

**Figure S8.** X-ray diffraction scans of ZVI precipitates reacted with Se(VI) in ZVI, ZVI/Fe<sup>2+</sup>, S-ZVI, and S-ZVI/Fe<sup>2+</sup> systems at different reaction time. Reaction conditions: pH<sub>0</sub> 6.0, [Se(VI)]<sub>0</sub> = 30.0 mg/L, ZVI = 0.50 g/L, [Fe<sup>2+</sup>]<sub>0</sub> = 0.50 mM, Alfa ZVI.

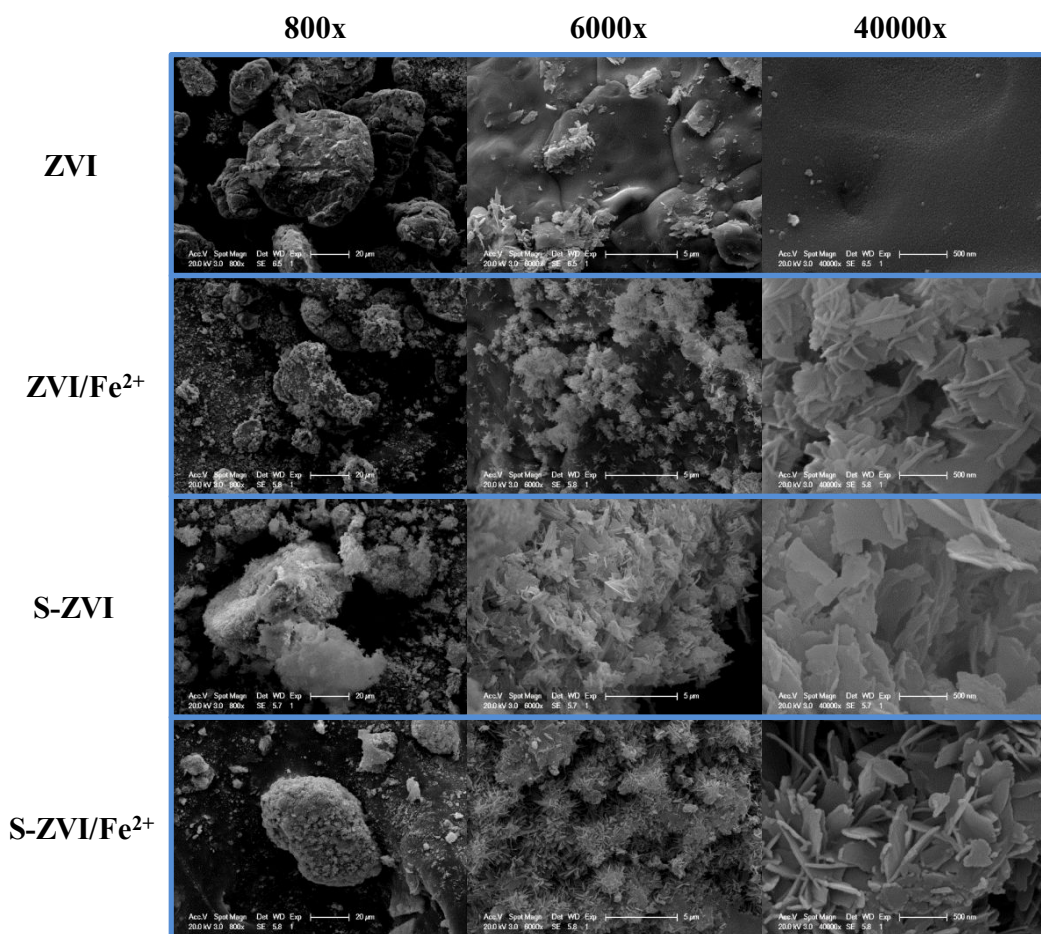

**Figure S9.** SEM images of ZVI precipitates reacted with Se(VI) in ZVI, ZVI/Fe<sup>2+</sup>, S-ZVI, and S-ZVI/Fe<sup>2+</sup> systems. 800x, 6000x, and 40000x represent the magnifications. Reaction conditions: pH<sub>0</sub> 6.0, [Se(VI)]<sub>0</sub> = 30.0 mg/L, ZVI = 0.50 g/L, reaction time = 12.0 h, [Fe<sup>2+</sup>]<sub>0</sub> = 0.50 mM, Alfa ZVI.



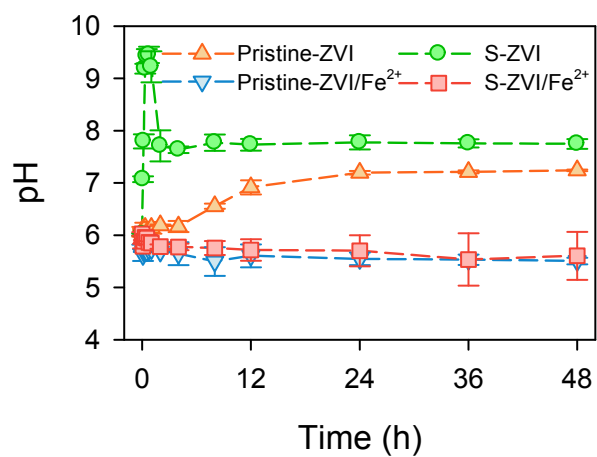

287

288 **Figure S10.** Influence of Fe<sup>2+</sup> dosing on variation of pH values during Se(VI)  
 289 removal by ZVI or S-ZVI. Reaction conditions: pH<sub>0</sub> 6.0, [Se(VI)]<sub>0</sub> = 30.0 mg/L, ZVI  
 290 = 0.50 g/L, [Fe<sup>2+</sup>]<sub>0</sub> = 0.50 mM, Alfa ZVI.

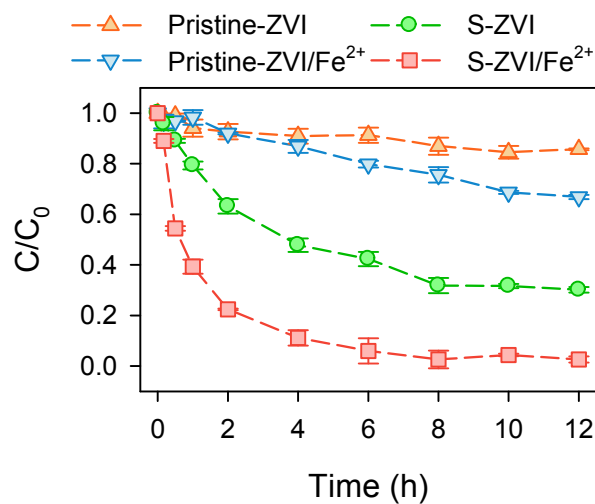

291

292 **Figure S11.** Influence of  $Fe^{2+}$  dosing on the kinetics of  $Se(VI)$  removal by ZVI and  
 293 S-ZVI at pH 5.5. Reaction conditions: pH value of the reaction mixture was stabilized  
 294 at 5.5 by manually adding HCl and/or NaOH,  $[Se(VI)]_0 = 30.0$  mg/L, ZVI = 0.50 g/L,  
 295  $[Fe^{2+}]_0 = 0.50$  mM, Alfa ZVI.

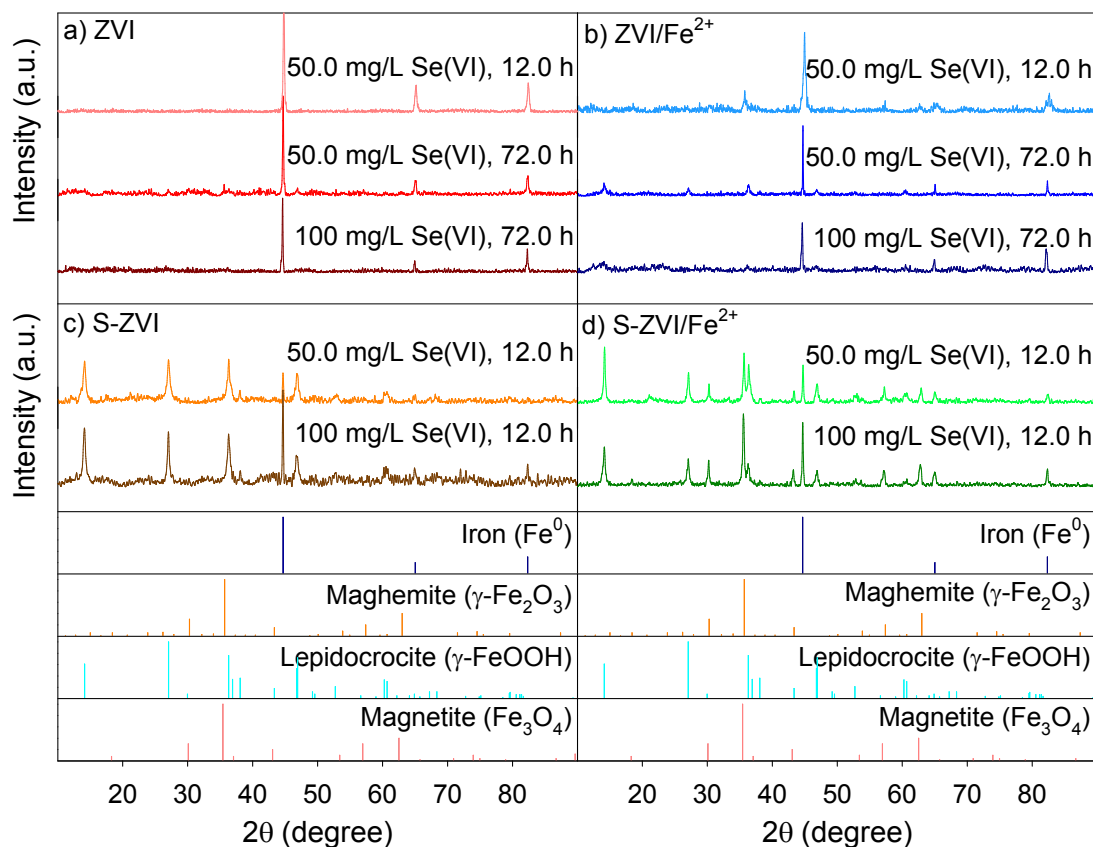

**Figure S12.** X-ray diffraction scans of ZVI precipitates reacted with 50.0 or 100 mg/L Se(VI) in ZVI, ZVI/Fe<sup>2+</sup>, S-ZVI, and S-ZVI/Fe<sup>2+</sup> systems. Reaction conditions: pH<sub>0</sub> 6.0, ZVI = 0.50 g/L, [Fe<sup>2+</sup>]<sub>0</sub> = 0.50 mM, Alfa ZVI, reaction time = 12 or 72 h.

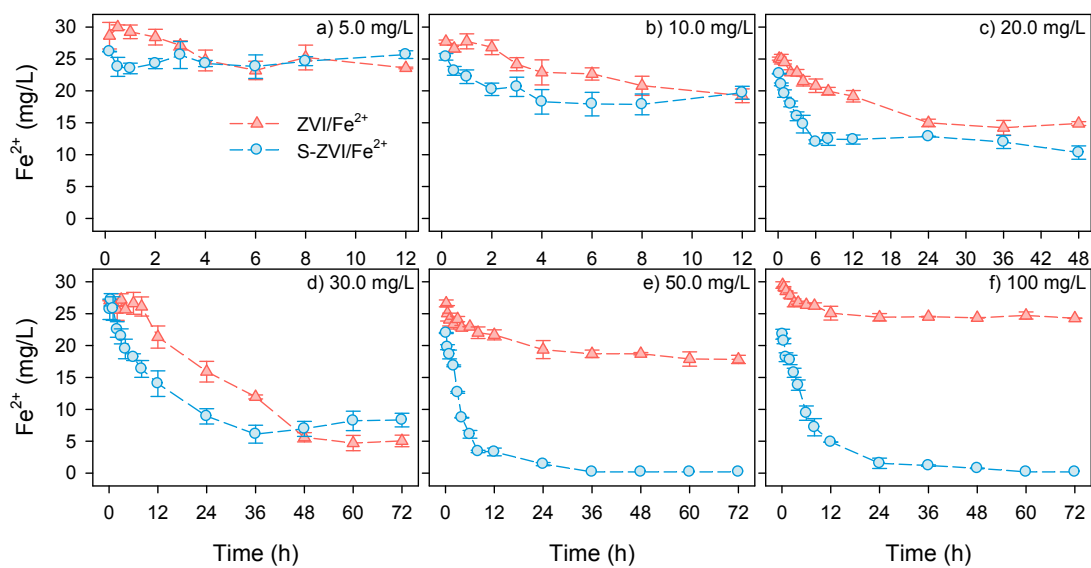

**Figure S13.** Variations of  $\text{Fe}^{2+}$  concentrations in the ZVI/Fe $^{2+}$  and S-ZVI/Fe $^{2+}$  systems at different initial Se(VI) concentrations. Reaction conditions:  $\text{pH}_0$  6.0, ZVI = 0.50 g/L,  $[\text{Fe}^{2+}]_0 = 0.50$  mM, Alfa ZVI.

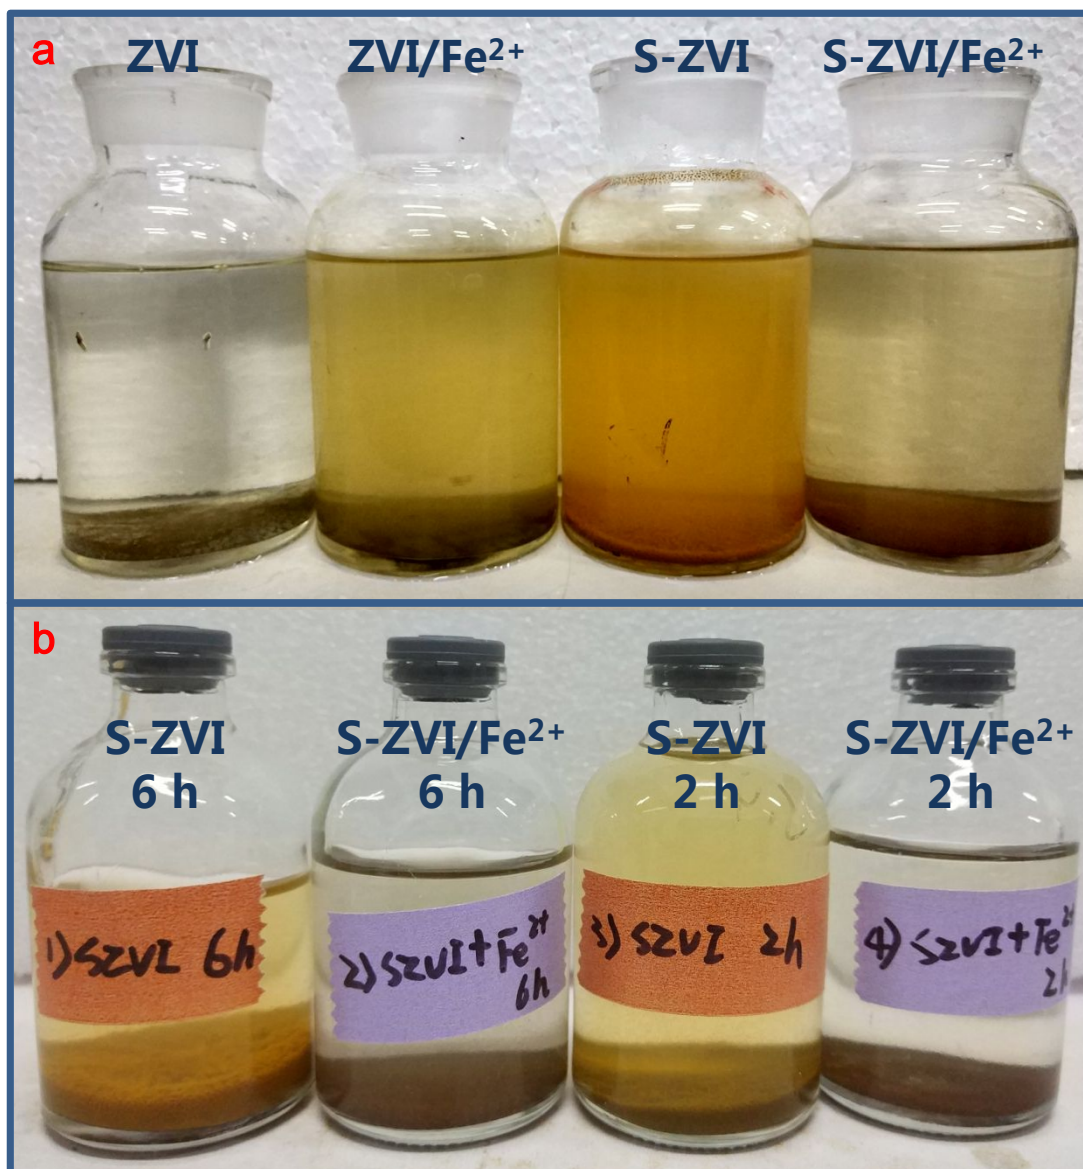

304

305 **Figure S14.** Real-time photos of solutions after Se(VI) reacted with (a) ZVI,  
 306 ZVI/Fe<sup>2+</sup>, S-ZVI, and S-ZVI/Fe<sup>2+</sup> systems at 12.0 h; (b) S-ZVI and S-ZVI/Fe<sup>2+</sup>  
 307 systems at 2.0 h and 6.0 h. Reaction conditions: pH<sub>0</sub> 6.0, [Se(VI)]<sub>0</sub> = 30.0 mg/L, ZVI  
 308 = 0.50 g/L, [Fe<sup>2+</sup>]<sub>0</sub> = 0.50 mM, Alfa ZVI.

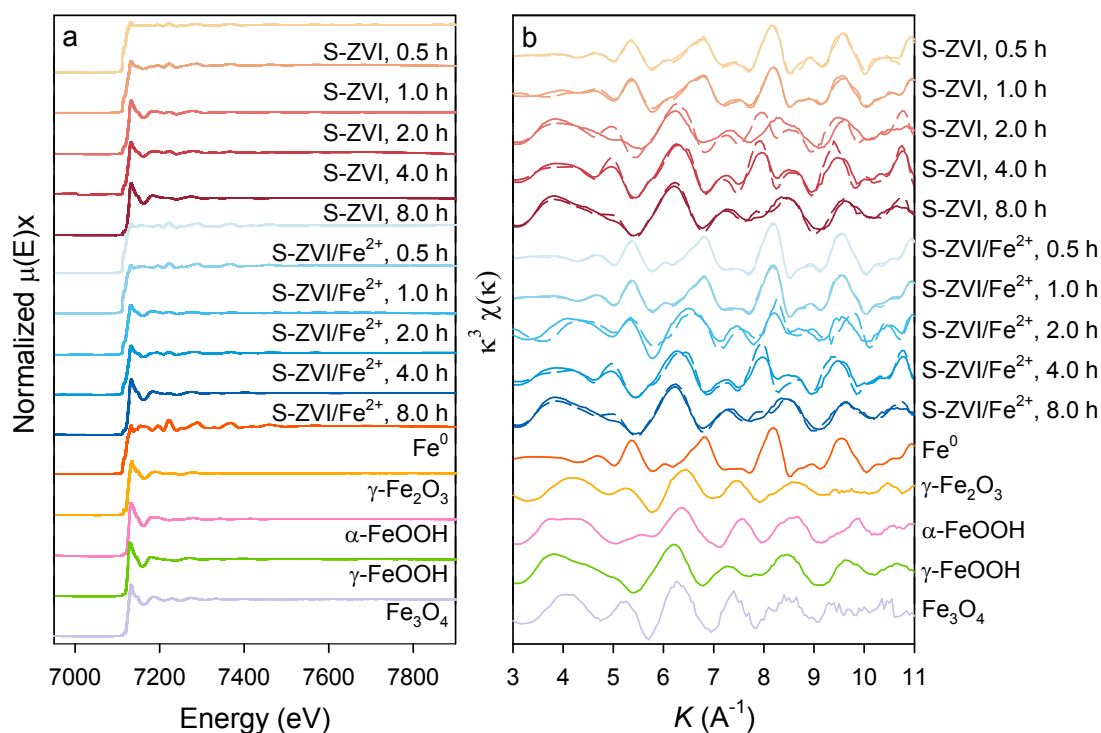

**Figure S15.** Fe  $K$ -edge EXAFS spectra (a) and Fe  $k^3$ -weighted EXAFS spectra (b) of S-ZVI samples reacted with Se(VI) for different durations without and with  $\text{Fe}^{2+}$ . Experimental data are shown as the dashed lines and the solid lines represent the LCF results and the spectra of the reference materials in (b). Reaction conditions:  $\text{pH}_0$  6.0,  $[\text{Se(VI)}]_0 = 30.0$  mg/L, S-ZVI = 0.50 g/L,  $[\text{Fe}^{2+}]_0 = 0.50$  mM, Alfa ZVI.

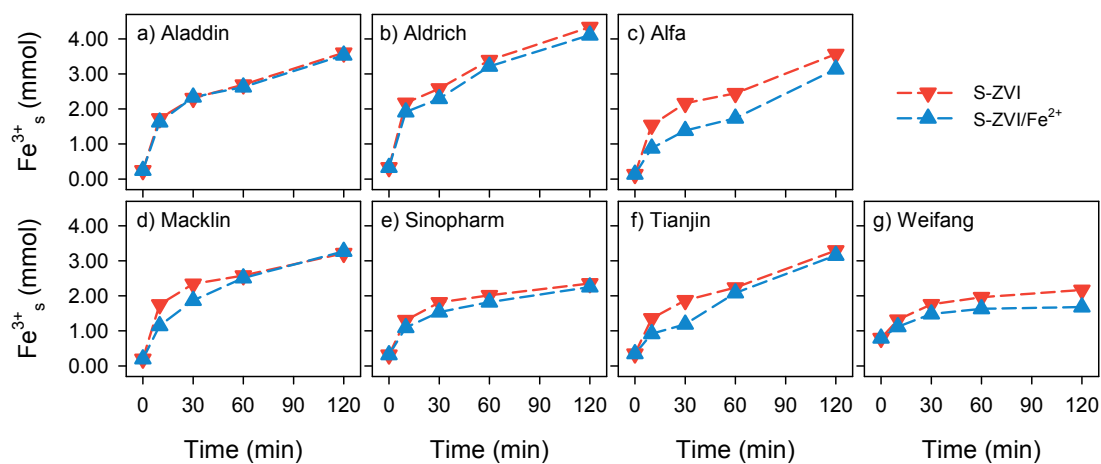

**Figure S16.** The variation of  $\text{Fe}^{3+}$  quantity in the solid phase of S-ZVI and S-ZVI/ $\text{Fe}^{2+}$  systems during Se(VI) removal, using 7 types of ZVI. Reaction conditions:  $\text{pH}_0$  6.0,  $[\text{Se(VI)}]_0 = 30.0$  mg/L, S-ZVI = 0.50 g/L,  $[\text{Fe}^{2+}]_0 = 0.50$  mM.

**Table S1.** Summary of the properties of the ZVI and S-ZVI samples employed in this study.

| Origin    | ZVI samples | Size/d <sub>50</sub> , μm | SSA*/m <sup>2</sup> g <sup>-1</sup> |
|-----------|-------------|---------------------------|-------------------------------------|
| Aladdin   | ZVI         | 32.4                      | 0.62                                |
|           | S-ZVI       | 32.2                      | 0.63                                |
| Aldrich   | ZVI         | 119.4                     | 0.12                                |
|           | S-ZVI       | 49.9                      | 0.20                                |
| Alfa      | ZVI         | 46.2                      | 0.47                                |
|           | S-ZVI       | 28.8                      | 0.92                                |
| Macklin   | ZVI         | 38.6                      | 0.55                                |
|           | S-ZVI       | 35.1                      | 0.61                                |
| Sinopharm | ZVI         | 40.5                      | 0.15                                |
|           | S-ZVI       | 33.8                      | 0.42                                |
| Tianjin   | ZVI         | 80.8                      | 0.19                                |
|           | S-ZVI       | 46.5                      | 0.66                                |
| Weifang   | ZVI         | 48.4                      | 0.36                                |
|           | S-ZVI       | 39.6                      | 0.88                                |

\*SSA represent the specific surface area determined by the BET method.



322 **Table S2.** Molar quantity of elements with various valence states before and after Se(VI) removal by S-ZVI and S-ZVI/Fe<sup>2+</sup> in different  
 323 reaction time. Reaction conditions: pH<sub>0</sub> 6.0, S-ZVI = 0.50 g/L, [Fe<sup>2+</sup>]<sub>0</sub> = 0.50 mM, Alfa ZVI.

| System                 | Reaction time (h) | State   | Amount of species (mmol) |        |         |        |        |        |        |        |        |        |
|------------------------|-------------------|---------|--------------------------|--------|---------|--------|--------|--------|--------|--------|--------|--------|
|                        |                   |         | Fe(0)                    | Fe(II) | Fe(III) | S(-II) | S(-I)  | S(0)   | S(VI)  | Se(0)  | Se(IV) | Se(VI) |
| S-ZVI                  | 0                 | Solid   | 3.87                     | 0.14   | 0.13    | 0.0655 | 0.0970 | 0.0488 | 0.0038 | \      | \      | \      |
|                        | 2.0               | Solid   | 0.79                     | 0.05   | 3.05    | 0.0736 | 0.0889 | 0.0469 | 0.0057 | 0.0427 | 0.0132 | 0.0104 |
|                        |                   | Aqueous | 0                        | 0      | 0       | 0      | 0      | 0      | 0      | 0      | 0      | 0.1237 |
|                        | 4.0               | Solid   | 0.39                     | 0.28   | 3.21    | 0.0808 | 0.0798 | 0.0473 | 0.0073 | 0.0582 | 0.0147 | 0.0013 |
|                        |                   | Aqueous | 0                        | 0      | 0       | 0      | 0      | 0      | 0      | 0      | 0      | 0.1158 |
|                        | 6.0               | Solid   | 0.23                     | 0.33   | 3.32    | 0.0855 | 0.0707 | 0.0499 | 0.0090 | 0.0602 | 0.0153 | 0      |
|                        |                   | Aqueous | 0                        | 0      | 0       | 0      | 0      | 0      | 0      | 0      | 0      | 0.1144 |
|                        | 12                | Solid   | 0.17                     | 0.53   | 3.18    | 0.0862 | 0.0726 | 0.0438 | 0.0126 | 0.0674 | 0.0121 | 0      |
|                        |                   | Aqueous | 0                        | 0      | 0       | 0      | 0      | 0      | 0      | 0      | 0      | 0.1105 |
|                        | 24                | Solid   | 0.02                     | 0.44   | 3.42    | 0.0506 | 0.0977 | 0.0562 | 0.0107 | 0.0688 | 0.0107 | 0      |
|                        |                   | Aqueous | 0                        | 0      | 0       | 0      | 0      | 0      | 0      | 0      | 0      | 0.1104 |
| S-ZVI/Fe <sup>2+</sup> | 2.0               | Solid   | 0.9189                   | 0.35   | 3.2367  | 0.1022 | 0.0550 | 0.0420 | 0.0160 | 0.0605 | 0.0279 | 0.0047 |
|                        |                   | Aqueous | 0                        | 0.20   | 0       | 0      | 0      | 0      | 0      | 0      | 0      | 0.0969 |
|                        | 4.0               | Solid   | 0.4512                   | 0.36   | 3.7014  | 0.0948 | 0.0572 | 0.0451 | 0.0181 | 0.0984 | 0.0252 | 0.0025 |
|                        |                   | Aqueous | 0                        | 0.20   | 0       | 0      | 0      | 0      | 0      | 0      | 0      | 0.0638 |
|                        | 6.0               | Solid   | 0.2876                   | 0.37   | 3.8632  | 0.1007 | 0.0516 | 0.0413 | 0.0216 | 0.1310 | 0.0307 | 0      |
|                        |                   | Aqueous | 0                        | 0.19   | 0       | 0      | 0      | 0      | 0      | 0      | 0      | 0.0282 |
|                        | 12                | Solid   | 0.1685                   | 0.59   | 3.7674  | 0.1055 | 0.0448 | 0.0407 | 0.0242 | 0.1552 | 0.0253 | 0      |
|                        |                   | Aqueous | 0                        | 0.18   | 0       | 0      | 0      | 0      | 0      | 0      | 0      | 0.0095 |
|                        | 24                | Solid   | 0.0524                   | 0.71   | 3.8441  | 0.0825 | 0.0604 | 0.0517 | 0.0206 | 0.1710 | 0.0190 | 0      |
|                        |                   | Aqueous | 0                        | 0.10   | 0       | 0      | 0      | 0      | 0      | 0      | 0      | 0      |

## Reference

- (1) Fan, P.; Li, L.; Sun, Y.; Qiao, J.; Xu, C.; Guan, X. Selenate removal by Fe<sup>0</sup> coupled with ferrous iron, hydrogen peroxide, sulfidation, and weak magnetic field: A comparative study. *Water Res.* **2019**, *159*, 375-384.
- (2) Li, J.; Zhang, X.; Liu, M.; Pan, B.; Zhang, W.; Shi, Z.; Guan, X., Enhanced reactivity and electron selectivity of sulfidated zerovalent iron toward chromate under aerobic conditions. *Environ. Sci. Technol.* **2018**, *52* (5), 2988-2997.
